# Supplementary material for: FoxO6 and PGC-1α form a regulatory loop in myogenic cells
Source: PubMed Central journal article supplement (PMC3681252; doi:10.1042/bsr20130031), 2013-06-13
Supplement: bsr033e045add.pdf [file bsr033e045add.pdf]

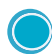

## OPEN ACCESS

## SUPPLEMENTARY DATA

# FoxO6 and PGC-1 $\alpha$ form a regulatory loop in myogenic cells

Shih Ying CHUNG\*, Wei Chieh HUANG\*, Ching Wen SU\*, Kuan Wei LEE\*, Hsiang Cheng CHI\*, Cheng Tao LIN\*, Szu-Tah CHEN†, Kai Min HUANG\*, Mu Shiun TSAI‡, Hui Peng YU\* and Shen Liang CHEN\*<sup>1</sup>

\*Department of Life Sciences, National Central University, Jhongli 32001, Taiwan, †Division of Endocrinology and Metabolism, Chang Gung Memorial Hospital, Kweishan 33333, Taoyuan, Taiwan, and ‡Department of Pathology and Medical laboratory, Taiwan Landseed Hospital, Pingjen 32449, Taoyuan, Taiwan

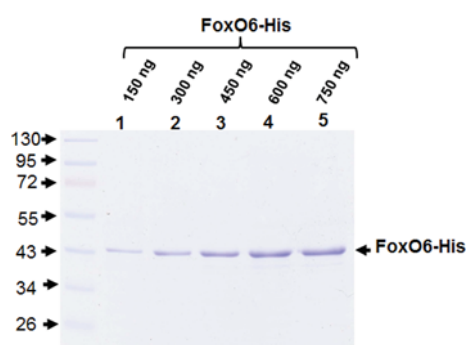

**Figure S1 Purified recombinant FoxO6 (amino acid 229–492)-His protein**

Various amounts of *E. coli* expressed recombinant protein was purified with nickel-NTA beads and run on 10% SDS/PAGE gels. Protein on the gel was viewed by Coomassie blue staining. Numbers to the left represent molecular weight in kilodalton (kDa).

<sup>1</sup> To whom correspondence should be addressed (email slchen@cc.ncu.edu.tw).

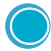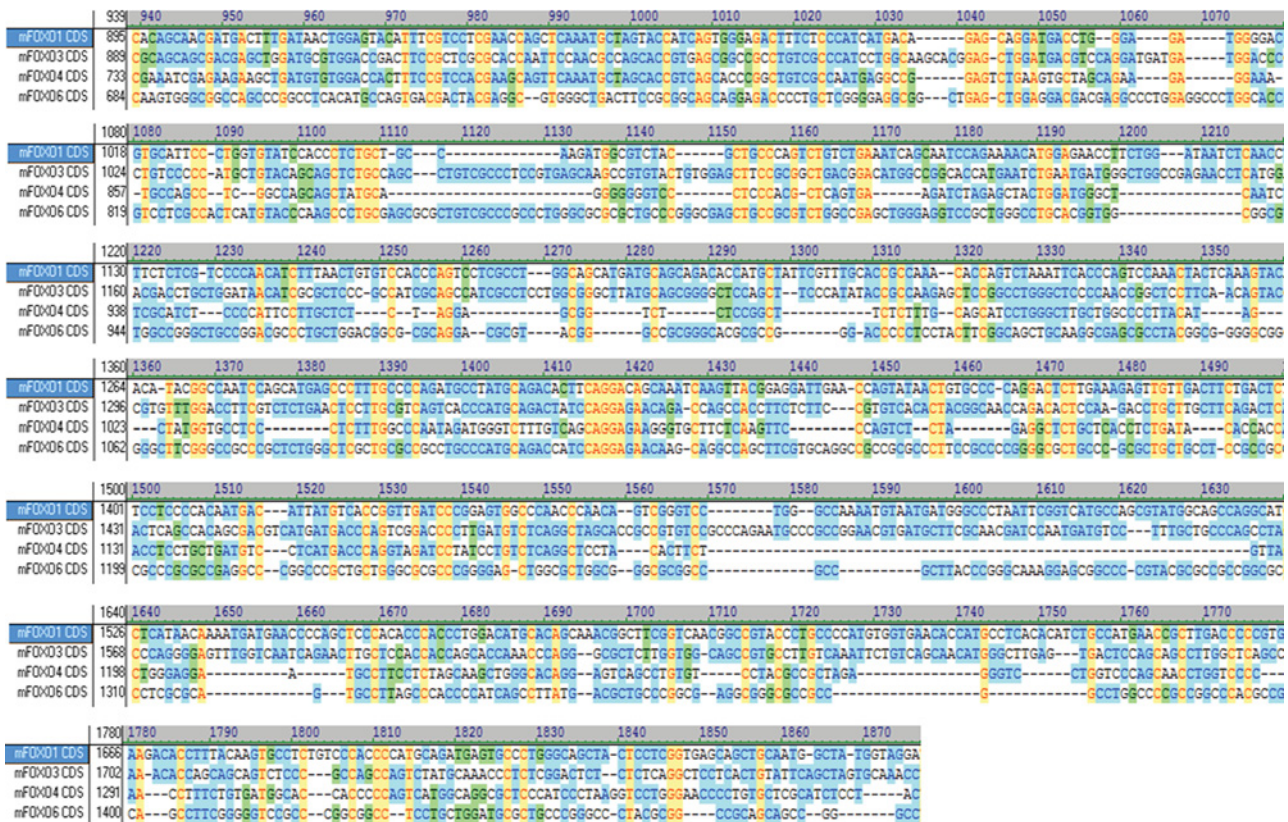

**Figure S2** Alignment of the mouse FoxO family mRNAs

The sequence of the mouse FoxO family mRNAs was aligned with Vector NTI software and the lease conserved region among FoxO families is shown here.

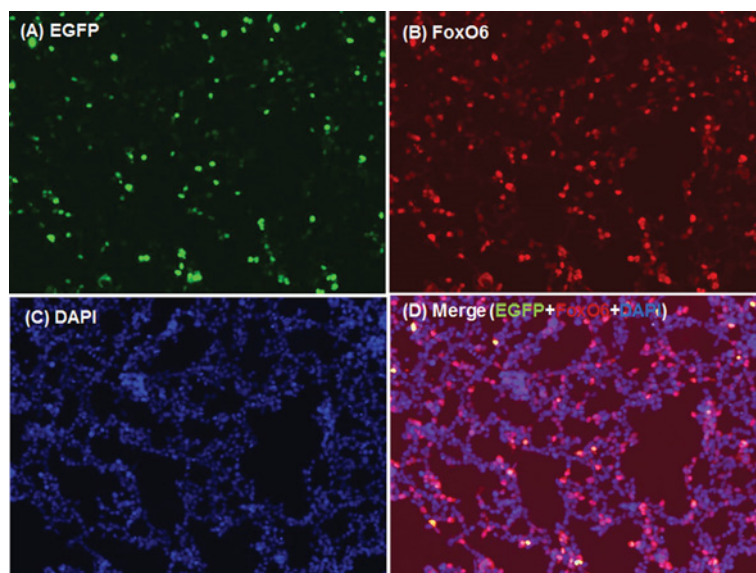

**Figure S3 FoxO6 antibody recognizes FoxO6-EGFP in HEK-293 cells**

HEK-293 cells were transfected with vector expressing FoxO6-EGFP and the expression of FoxO6-EGFP was recognized by immunofluorescence using FoxO6 antibody and viewed with Texas red-conjugated secondary antibody (B). The signals of EGFP (A) and DAPI (4',6-diamidino-2-phenylindole) (C) shows significant overlapping with that of FoxO6 (D).

---

Received 18 March 2013/30 April 2013; accepted 2 May 2013

Published as Immediate Publication 3 May 2013, doi 10.1042/BSR20130031

---
